# Supplementary material for: Innovative Bayesian and Parsimony Phylogeny of Dung Beetles (Coleoptera, Scarabaeidae, Scarabaeinae) Enhanced by Ontology-Based Partitioning of Morphological Characters
Source: PLoS One. 2015 Mar 17;10(3):e0116671. doi: 10.1371/journal.pone.0116671 (PMC4363793; doi:10.1371/journal.pone.0116671)
Supplement: S1 Matrix — (NEX) [file pone.0116671.s009.nex]

#NEXUS
[written Fri Mar 07 19:14:33 CET 2014 by Mesquite  version 2.75 (build 564) at PCNHM138/129.240.32.42]

BEGIN TAXA;
	TITLE Taxa;
	DIMENSIONS NTAX=110;
	TAXLABELS
		'Aphodius_erraticus' 'Podotenus_fulviventris' 'Aulonocnemis_crassecostata' 'Manjarivolo_sp' 'Coptorhina_auspicata' 'Delopleurus_sp' 'Frankenbergerius_armatus' 'Sarophorus_costatus' 'Odontoloma_sp' 'Nebulasilvius_insularis' 'Endroedyolus_paradoxus' 'Dicranocara_deschodti' 'Byrrhidium_namaquensis' 'Paraphytus_sp' 'Epirinus_sp' 'Neosisyphus_sp' 'Macroderes_mutilans' 'Xinidium_dentilabris' 'Pedaria_sp' 'Gyronotus_carinatus' 'Anachalcos_convexus' 'Hammondantus_psammophilus' 'Pycnopanelus_krikkeni' 'Janssensantus_pauliani' 'Aphengoecus_multiserratus' 'Bohepilissus_sp' 'Circellium_bacchus' 'Dwesasilvasedis_medinae' 'Coptodactyla_nitida' 'Amphistomus_calcaratus' 'Aulacopris_maximus' 'Canthonosoma__macleayi' 'Boletoscapter_cornutus' 'Gen._nov._sp._nov.' 'Cephalodesmius_armiger' 'Coproecus_hemisphaericus' 'Demarziella_interrupta' 'Diorygopyx_tibialis' 'Mentophilus_hollandiae' 'Onthobium__gutierrez' 'Pseudonthobium_sinuatotibiale' 'Tesserodon_erratum' 'Saphobius_sp' 'Bdelyrus_seminudus' 'Tesserodoniella__elguetai' 'Canthochilum_tureyra' 'Canthonella_silphoides' 'Cryptocanthon_paradoxus' 'Paracanthon_sp_sp_n_' 'Streblopus_opatroides' 'Zonocopris_gibbicollis' 'Genieridium_margareteae' 'Onoreidium_howdeni' 'Trichillum_pauliani' 'Scatimus_strandi' 'Aphengium_cupreum' 'Ateuchus_squalidus' 'Ateuchus_histeroides' 'Agamopus_lampros' 'Agamopus_viridis' 'Canthidium_bokermanni' 'Chalcocopris_hesperus' 'Dichotomius_sp' 'Dichotomius_sericeus' 'Homocopris_torulosus' 'Ontherus_appendiculatus' 'Uroxys_latesulcatus' 'Uroxys_epipleuralis' 'Uroxys_pauliani' 'Bdelyropsis_bowditchi' 'Canthon_virens' 'Malagoniella_yucateca' 'Megathoposoma_candezei' 'Scybalophagus_rugosus' 'Deltochilum_sp__' 'Scybalocanthon_nigriceps' 'Hansreia_sp' 'Silvicanthon_bridarollii' 'Tetraechma_sanguineomaculata' 'Anomiopus_edmondsi' 'Scatonomus_fasciculatus' 'Sinapisoma_sp' 'Heliocopris_sp' 'Catharsius_sp' 'Metacatharsius_sp' 'Copris_sp' 'Pseudopedaria_grossa' 'Microcopris_sp' 'Gromphas_aeruginosa' 'Coprophanaeus_telamon' 'Oruscatus_davus' 'Phanaeus_splendidulus' 'Ennearabdus_lobocephalus' 'Eucranium_arachnoides' 'Glyphoderus_monticola' 'Eurysternus_hamaticollis' 'Pachysoma_aesculapius' 'Scarabaeus_aegyptiorum' 'Paragymnopleurus_sp' 'Gymnopleurus_leei' 'Epactoides_sp1' 'Epactoides_sp2' 'Ochicanthon_sp' 'Apotolamprus__quadrimaculatus' 'Arachnodes_sp_' 'Tanzanolus_sp' 'Onthophagus_avocetta' 'Helictopleurus_quadripunctatus' 'Bubas_bison' 'Onitis_sp' 
	;

END;


BEGIN CHARACTERS;
	TITLE  Character_Matrix;
	DIMENSIONS  NCHAR=205;
	FORMAT DATATYPE = STANDARD GAP = - MISSING = ? SYMBOLS = "  0 1 2 3 4 5 6 7 8 9 A B C D E F G H J K M N P Q R S T U V W X Y Z a b c d e f g h j k m n p q r s t u v w";
	CHARSTATELABELS 
		1 'Phallobase, basal area dorsally ' /  with_one_tubercle_on_each_side_ ' with single median tubercle or swell, sometimes depressed basally', 2 'Phallobase, general shape (dorsal view) ' /  'cylindrical; symmetrical (i.e. sides of phallobase positioned parallel to each other) or sometimes feebly subsymmetrical ' ' asymmetrical; left basal corner of phallobase distinctly skewed toward right corner', 3 'Phallobase, ground plan of ventral part ' /  'ventral portion reduced presenting large phallobase opening starting at apical margin and continually enlarging toward base; sclerotization of ventral portion (if present laterally) subtle, translucent ' ' ventral part present, distinctly sclerotized; opening small usually occupying only basal area of phallobase; sometimes opening extends apically but never occupies entire ventral portion whose sclerotization is always distinct', 4 'Phallobase, rectangular notch of basal margin, presence (rear view) ' /  absent_ _present, 5 Phallobase_widened_and_curved_medially_in_lateral_view_ /  absent_ _present, 6 'Parameres, presence of asymmetry ' /  'absent; both parameres symmetrical ' ' present; right paramere modified, usually enlarged (rarely reduced) and curved inward or outward; sometimes modification of right paramere subtle in comparison to left one', 7 'Parameres, relatively wide, rounded apically (Macroderes ? Xinidium ground plan) ' /  absent_ _present_, 8 'Parameres, distinctly acute apically (Dicranocara - Byrrhidium ground plan) ' /  absent_ _present_, 9 'Parameres, simple, tiny, apically acute (Nebulasilvius, Endroedyolus, Odontoloma ground plan) ' /  absent_ _present, 10 'Parameres asymmetrical; right paramere widely and obtusely rounded; left paramere widely notched preapically (Hammondantus - Pycnopanelus ground plan) ' /  absent_ _present, 11 'Left paramere wide in lateral view, rounded apically; right paramere asymmetrical (Aulacopris - Canthonosoma ground plan) ' /  absent_ _present, 12 'Parameres long, thin (Catharsius ground plan) ' /  absent_ _present, 13 'Parameres, membrane on lower side strongly sclerotized with two notches basally ' /  absent_ _present, 14 'Parameres, short, rounded apically  (Trichillum, Genieridium cryptops, Onoreidium ground plan) ' /  absent_ _present, 15 'Parameres, triangular in lateral view, relatively short (Ateuchus ground plan) ' /  absent_ _present, 16 'Parameres shortened, basolateral plate projected ' /  absent_ _present, 17 'Parameres long, beak-shaped (Onitis, Bubas ground plan) ' /  absent_ _present, 18 Parameres_extremely_reduced_ /  absent_ _present, 19 'Parameres, tips curved upward and more or less bent inward ' /  absent_ _present, 20 'Endophallic sclerites located in superior part of the sac  (Trichillum, Genieridium, Onoreidium ground plan) ' /  absent_ _present, 21 'Axial sclerite more or less aciculiform, simple without complex additional lobes ' /  absent_ _present, 22 Axial_sclerite_presence_ /  absent_ _present, 23 'Axial sclerite and aedeagal sac, ground plan (Frankenbergerius, Coptorhina, Paraphytus, Dicranocara, Endroedyolus ground plan) ' /  'axial sclerite processed in several lobes and occupying basal part of aedeagal sac; basal part of aedeagal sac possess either solely A or A and BSc sclerites ' ' axial sclerite differently shaped i.e. simple, without multiple lobes, normally cylindrical or axial sclerite absent.', 24 'Axial sclerite, central spur-shaped lobe extends from median area of surrounding lobe (Endroedyolus, Dicranocara and Paraphytus ground plan)' /  _absent_ _present, 25 'Axial sclerite, central lobe thin and long, surrounding lobe notched on right side (Nebulasilvius-Endroedyolus ground plan)' /  _absent_ _present, 26 'Axial sclerite, central lobe short, surrounding lobe more or less triangular (Dicranocara-Byrrhidium ground plan)' /  _absent_ _present, 27 'Axial sclerite, occupies most of basal area of sac; structurally complex; consists of central spur-like sclerite surrounded by multiple lobes; SA sclerites absent (Frankenbergerius ? Coptorhina ground plan)' /  _absent_ _present_, 28 'Axial sclerite, inferior part significantly narrower than remaining portion of sclerite (Macroderes ? Xinidium groundplan) ' /  absent_ _present_, 29 'Axial sclerite, aciculiform or with few lobes inferiorly joint with BSc (Trichillum, Genieridium cryptops, Onoreidium ground plan) ' /  absent_ _present, 30 'Axial sclerite,  bi- or trifurcated ' /  absent_ _present, 31 'Axial sclerite, has unique elongate shape with multiple surrounding lobes located in different planes (Canthochilum ground plan) ' /  absent_ _present, 32 'Axial sclerite associated with multiple surrounding sclerites  ( Gymnopleurus ground plan) ' /  absent_ _present, 33 'Axial sclerite, median portion or tip with sclerotized process extending inferiorly ' /  absent_ _present, 34 'Axial sclerite, tip with sclerotized process extending inferiorly ' /  absent_ _present, 35 'Axial sclerite, ?-shaped (largely bifurcated inferiorly) ' /  absent_ _present, 36 SA_sclerite_ /  absent_ _present_, 37 'SA sclerite tightly wrapped within axial sclerite; almost inseparable but recognizable (Anachalcos, Gyronotus ground plan) ' /  'absent (either SA and A not wrapped tightly or SA and A sclerites not fused, and easy separable or SA and A sclerites distinctly fused or SA and/or A absent)' _present, 38 'SA and A sclerites distantly located however interlinked with basal extension of A sclerite (Pedaria, Coptodactyla) ' /  absent_ _present, 39 'SA sclerite bifurcate (Microcopris, Pseudopedaria) ' /  absent_ _present, 40 'A and SA joint inferiorly by means of inferior accessory sclerite (IAS1) (Microcopris, Pseudopedaria ground plan) ' /  absent_ _present, 41 'SA and A strongly fused (Amphistomus ground plan) ' /  absent_ _present_, 42 'SA and A sclerites long, occupies at least entire inferior half of sac ' /  absent_ _present, 43 'SA and A sclerites fused together (Epactoides ground plan) ' /  absent_ _present, 44 'FLP*, presence ' /  absent_ _present_, 45 'FLP*, large, roughly c-shaped' /  _absent_ _present, 46 'FLP* small, slightly bent right' /  _absent_ _present, 47 'SRP, presence' /  _absent_ _present, 48 'SRP ring-shaped ' /  'absent (SRP differently shaped: without any trace of ring-shaped structure, or absent)' ' present  or at least ring-shape partly formed by poorly visible membrane', 49 'SRP semicircular or straight (not ring-shaped) ' /  absent_ _present_, 50 'SRP sclerite represents flat lamella located along right side of aedeagal sack; SRP bears small ring structure apically (Epirinus - Neosisyphus ground plan) ' /  absent_ _present, 51 'SRP not ringed, thin, its left tip enlarged (Agamopus ground plan) ' /  absent_ _present, 52 'SRP sclerite located in vertical plane, flat, ringed on the top, and with arm-like process toward rear side  (Cryptocanthon ? Paracanthon  ground plan) ' /  absent_ _present, 53 'Spiculum gastrale, basal sclerites ' /  absent_or_very_weakly_sclerotized _distinctly_present, 54 'Spiculum gastrale, basal margin with narrow process apically (Dicranocara-Byrrhidium ground plan) ' /  absent_ _present, 55 'Spiculum gastrale, apical margin widely rounded; basal margin with triangular process (Coptodactyla ? Demarziella ground plan) ' /  absent_ _present, 56 'Spiculum gastrale, medial portion narrow, straight; basal process long (Catharsius ground plan) ' /  absent_ _present, 57 'FLP sclerite(s), presence' /  absent_ _present_, 58 'FLP sclerite, small c-shaped, superior apical portion indistinctly sclerotized (Dichotomius groundplan) ' /  absent_ _present, 59 'FLP sclerite, located in front of SA and A sclerites and composed of three distinct lobes ' /  absent_ _present, 60 'FLP sclerite, big, long, comprising 2-3 distinct lobes located in the same plane ' /  absent_ _present, 61 'BSc sclerite, semicircularly shaped, presence ' /  absent_ _present, 62 'LC large, ring-shaped in horizontal plane  (Dichotomius ground plan) ' /  _absent_ _present, 63 LC_well_developed_and_composed_of_superior_and_inferior_lobes_ /  absent_ _present, 64 'IAS2 sclerite, presence (Microcopris, Pseudopedaria) ' /  absent_ _present, 65 Elytron_with_7_distinctly_visible_striae_ /  absent_ _present, 66 Elytron_with_8_distinctly_visible_striae_ /  absent_ _present, 67 Elytron_with_9_distinctly_visible_striae_ /  absent_ _present, 68 Elytron_with_10_distinctly_visible_striae_ /  absent_ _present, 69 'Elytron with 7 stria and/or traces of striation ' /  absent_ _present, 70 'Elytron with 8 stria and/or traces of striation 8 ' /  absent_ _present, 71 'Elytron with 9 stria and/or traces of striation ' /  absent_ _present, 72 'Elytron with 10 stria and/or traces of striation ' /  absent_ _present, 73 'Elytron, 1st elytral carina ' /  absent_ _present, 74 'Elytron, internal margin of 1st elytral carina adjoins 7th stria ' /  absent_ _present, 75 'Elytron, internal margin of 1st elytral carina adjoins 8th stria ' /  absent_ _present, 76 'Elytron, 2nd elytral carina located on pseudoepipleuron ' /  absent_ _present, 77 'Elytron, internal margin of 2nd elytral carina on pseudoepipleuron adjoins 8th stria ' /  absent_ _present, 78 'Elytron, internal margin of 2nd elytral carina on pseudoepipleuron adjoins 9th stria ' /  absent_ _present, 79 'Elytron, internal margin of 2nd elytral carina on pseudoepipleuron adjoins 10th stria ' /  absent_ _present, 80 'Elytron, 2nd elytral not located on non-pseudoepipleuron; its internal margin adjoins 8th stria () ' /  absent_ _present, 81 'Elytron, 1st elytral carina, number of ridges ' /  one_ _two, 82 'Elytron, 8th stria largely reduced (Anomiopus -  Scatonomus) ' /  absent_ _present, 83 'Elytron, 9th stria closely approaches 10th stria preapically, and diverges from 10th stria basally ' /  absent_ _present, 84 'Elytron, lateral margin subrectangularly protruded preapically ' /  absent_ _present, 85 'Elytron notched laterally by protrusion of metepisternum (Frankenbergerius ? Delopleurus) ' /  absent_ _present, 86 'Elytron, last stria (9th or 8th) visible only preapically' /  absent_ _present_, 87 'Epipleuron, size ' /  relatively_narrow _large, 88 'Elytron, 7th and 8th striae largely reduced and visible only preapically' /  _absent_ _present, 89 'Elytron, 8th and 9th striae fused but trace of interstria interval visible ' /  absent_ _present, 90 'Epipleuron, slightly protruded downward submedially ' /  absent_ _present, 91 'Elytron, 8th or 8th+9th stria(ae) distinctly depressed ' /  absent_ _present, 92 'Elytron, 8th stria extends from apex to median portion of elytra, and very closely located to the 9th stria extending all way from apex to base ' /  absent_ _present, 93 'Elytron, out of two last striae (8th and 9th or 9th and 10th), inner one extends from apex to median portion of elytra, and closely located to (merged with) outer one extending from apex to base' /  absent_ _present, 94 'Elytron, 8th stria developed only in medial portion of elytron ' /  absent_ _present, 95 'Elytron, notched laterally by protrusion of abdominal tergites ' /  absent_ _present, 96 'Wing, RA4 significantly longer than RP1; RP1 arcuate, not parallel to RA4 ' /  absent_ _present, 97 'Wing, MPa largely extends toward junction of Cu and MP1+2, and consists of two distinct halves; of them anterior significantly wider than posterior one ' /  absent_ _present, 98 'Wing, AA4 widened along posterior margin ' /  absent_ _present, 99 'Wing, Cu widened along posterior margin ' /  absent_ _present, 100 'Wing, RP1 with posterior sclerite ' /  absent_ _present, 101 'Wing, RP1 posterior sclerite represents small basal appendix of RP1 ' /  absent_ _present, 102 'Wing, RP1 with wide posterior sclerite ' /  absent_ _present, 103 'Wing, RA4 significantly thinner than RP1 , arcuate and not parallel to RA4; RA4 fused basally with RP1 ' /  absent_ _present, 104 'Wing, RP1 with small anterior sclerite basally ' /  absent_ _present, 105 'Wing, posterior sclerite of RP1 separated from RP1 ' /  absent_ _present, 106 'Wing, RP1 and its posterior sclerite fused proximally but bifurcate distally, distinctly diverging from each other ' /  absent_ _present, 107 'Wing, MP4 curved and fused with Cu ' /  absent_ _present, 108 'Wing, RA4 gradually  thinner medially where it fuses with RP1 ' /  absent_ _present, 109 'Wing, RA3 with posterior sclerite extending toward RA4 or even merging with it ' /  absent_ _present, 110 'Wing, RP1 posterior sclerite approaches RP1 basally, almost fusing with it (Ochicanthon, Epactoides ground plan) ' /  absent_ _present, 111 'Wing, junction of RA3 and RP1 forms round notch (Ochicanthon - Epactoides ground plan) ' /  absent_ _present, 112 'Wing, J vein well developed; AP3+4 reduced ' /  absent_ _present, 113 'Wing, apical area bears sclerite located posteriorly of RP1 ' /  absent_ _present_, 114 'Wing, posterior sclerite of RA3 extends from median portion of RA3 to its tip ' /  absent_ _present, 115 'Wing, posterior sclerite of RA3 extends from base of RA3 to its median part ' /  _absent_ _present, 116 'Wing, MPa vein presence ' /  either_absent_or_very_weakly_developed_ _distinctly_present, 117 'Galea, dorsal part covered with big spurs ' /  absent_ _present, 118 Galea_elongate_and_covered_with_long_hairs_ /  absent_ _present, 119 'Galea and lacinia very closely located to each other; galea strongly sclerotized, hook-like ' /  absent_ _present, 120 'Galea and lacinia, galea strongly sclerotized, hook-like ' /  absent_ _present_, 121 'Galea basal sclerite, small, more or less round ' /  absent_ _present, 122 'Galea, basal sclerite longitudinally elongate' /  absent_ _present_, 123 'Maxilla, stipital sclerite II medially grooved; surface of groove shagreened ' /  absent_ _present, 124 'Galea, dorsal articular sclerite forms longitudinal carina on galea dorsal surface ' /  absent_ _present, 125 'Maxilla, stipital sclerite II, groove on anterior outer margin ' /  absent_ _present, 126 'Maxilla, enlarged, strongly sclerotized, galea and lacinia reduced in size, round ' /  absent_ _present, 127 'Glossal flap ?-shaped, bending inward; its tip covered with big blunt spurs ' /  absent_ _present, 128 'Glossal flap thick; internal margin usually densely haired ' /  absent_ _present, 129 'Glossal flap thick; its tip bears membranous lobe that bent downward ' /  absent_ _present, 130 'Glossal flap short, with membranous lobes bent inward ' /  absent_ _present, 131 'Glossal flap triangularly enlarged frontally, haired ' /  absent_ _present, 132 Glossal_flap_shortened_and_wide_ /  absent_ _present, 133 'Glossa, internal margin, with dense brush of yellow hairs ' /  absent_ _present, 134 'Glossa, internal margin with thick dense wire-like hairs ' /  absent_ _present, 135 'Glossa, internal margin with distinct hairs ' /  absent_ _present, 136 'Glossa considerably enlarged, remarkably bigger than glossal flap ' /  absent_ _present, 137 'Hypopharyngeal suspensorium, lateral labial sclerite ' /  absent_ _present, 138 'Epipharynx, anterior third entirely sclerotized; its anterior margin tuberculated ' /  absent_ _present, 139 Epipharynx_with_triangular_deep_notch_anteriorly_ /  absent_ _present, 140 'Epipharynx anteriorly with large notch bearing large, strongly sclerotized tooth medially ' /  absent_ _present, 141 'Epipharynx, anterior margin slightly processed frontally and blunt medially ' /  absent_ _present, 142 'Epipharynx, anterior margin v-shaped ' /  absent_ _present, 143 'Epipharynx, anterior margin blunt, with small medial notch; anterior angles slightly rounded ' /  absent_ _present, 144 'Mandibles, incisor lobe ' /  mandibles_with_largely_extended_membranous_incisor_lobes_ _membranous_incisor_lobes_of_mandibles_distinctly_reduced, 145 'Right mandible, molar lobe enlarged, with big denticles ' /  absent_ _present, 146 'Right mandible, molar lobe enlarged, round ' /  absent_ _present, 147 'Gula, ventral surface with longitudinal groove ' /  absent_ _present, 148 'Gula, emarginated anteriorly; emargination shagreened and/or haired ' /  absent_ _present, 149 'Gula, internal structure ' /  'gular ridges invaginated only posteriorly, forming longitudinal lamella (dorsal process of tentorium) ' _gular_ridges_invaginated_almost_along_entire_area_of_gula_forming_a_sclerotized_roof_over_gula_with_dorsal_process_of_tentorium_posteriorly, 150 'Eye, degree of development ' /  'well-developed' _significantly_reduced, 151 'Clypeus, ventral anterior area with ridges forming rectangular pattern that medially divided into two parts ' /  absent_ _present, 152 'Clypeus, anterior margin with sharp ventral process ' /  absent_ _present, 153 'Clypeus, dorsal surface with two big fascicle of dense hairs laterally ' /  absent_ _present, 154 'Clypeus, apical emargination with medial pit ' /  absent_ _present, 155 'Head, posterior portion setting off anterior edges of eyes, shielded by pronotum (shielded area recognized by sculpture distinctly different from that of the rest of head); eyes not exposed dorsally ' /  absent_ _present, 156 'Antennal club, cavity on anterior surface of 1st and 2nd segments ' /  absent_ _present, 157 'Hypomera, anterior ridge stretches toward lateral margin of hypomera' /  absent_ _present, 158 'Hypomera, anterior ridge stretches to anterior angles of pronotum ' /  absent_ _present, 159 'Hypomera, anterior portion depressed ' /  absent_ _present, 160 'Hypomera, anterior ridge interrupted medially; lateral premarginal area of hypomera with short ridge ' /  absent_ _present, 161 'Hypomera, posterior longitudinal ridge' /  absent_ _present_, 162 'Pronotum, internal surface of basal margin with medial carina ' /  absent_ _present, 163 'Pronotum, basal margin with two depressions medially (or at least with their traces) ' /  absent_ _present, 164 'Prothorax, basisternal furca' /  absent_ _present_, 165 'Prosternum, sternellum remarkably enlarged ' /  absent_ _present, 166 'Prosternum, coxal depressions widened, closely approaching lateral margin of pronotum ' /  absent_ _present, 167 Proleg_with_trochantofemoral_pit_ /  absent_ _present, 168 'Protibia, internal apical angle processed and bears lamella-like setae ' /  absent_ _present, 169 'Protibia, apical spur ' /  'absent/invisible' ' present/visible', 170 Protarsus_in_male_ /  absent_ _present, 171 Protarsus_in_female /  absent_ _present, 172 'Protarsus, last tarsomere triangularly processed apically ' /  absent_ _present, 173 'Protarsus, claws ' /  absent_ _present, 174 'Protarsus, claws big, bifurcate preapically ' /  absent_ _present, 175 'Pro-, meso-, and metatarsus and apex of meso- and metatibia distinctly haired and/or setose ' /  absent_ _present, 176 'Pro-, meso-, and metatarsus and apex of meso- and metatibia, ventral surface, with short dense hairs ' /  absent_ _present, 177 'Meso- and metatarsus, claws ' /  absent_ _present, 178 'Meso- and metatarsus with one fixed claw ' /  absent_ _present, 179 Metatarsus_and_mesotarsus_with_thick_tarsomere_and_big_?laws_ /  absent_ _present, 180 'Meso- and metatarsus, last tarsomere triangularly projected apically ' /  absent_ _present, 181 'Metatibia, number of apical spurs ' /  no_visible_spurs _one _two, 182 'Mesotibia, number of apical spurs ' /  no_visible_spurs _one _two, 183 'Metepisternum, apex of lateral surface modified, convex and/or depressed (sometimes with unclear keel) ' /  absent_ _present, 184 'Metepisternum widened (lateral view) cut into elytron by notching it ' /  absent_ _present, 185 'Metepisternum shape (lateral view) more or less rectangular with apical part rounded ' /  absent_ _present, 186 'Metepisternum, lateral surface, apical suture ' /  absent_ _present, 187 Mesofurcal_arm_with_ /  only_one_lateral_process ' with two processes - lateral, and rear directed backward ', 188 'Mesofurcal arm, rear process gross, reaches metendosternite ' /  absent_ _present, 189 'Meso-metasternal pits ' /  absent_ _present, 190 'Metasternum, frontal part raised and projected forward' /  _absent_ _present, 191 'Mesoscutellum, visible from above in undissected specimen ' /  absent_ _present, 192 'Metascutellum, small, truncate, with bunch of hairs apically ' /  absent_ _present, 193 Abdomen_general_structure_ /  'abdomen soft; sternites separated from each other by membrane; 1st sternite well developed laterally ' ' abdomen strongly sclerotized; sternites tightly attached to each other lacking membranous interconnection; 1st sternite small', 194 'Abdomen, 7th sternite largely expanded and crowding out remain sternites along midline; remain sternites visible only laterally ' /  absent_ _present, 195 'Abdomen, 6th and 5th sternites almost or entirely fused; border between them almost or entirely invisible ' /  absent_ _present, 196 'Abdomen, 7th sternite distinctly squeezed along midline in both male and female ' /  absent_ _present, 197 'Abdomen, 7th sternite distinctly squeezed along midline only in male while more or less normally developed in female ' /  absent_ _present, 198 'Abdomen, ventral surface of 2nd-4th abdominal sternites runs over its dorsal surface ' /  absent_ _present, 199 'Abdomen, ventral surface of 2nd-4th abdominal sternites runs over its dorsal surface; ventral surface lacks suture between 2nd and 3rd sternites ' /  absent_ _present, 200 'Abdomen, lateral pheromone glands ' /  absent_ _present, 201 'Abdomen, 7th sternite grooved basally ' /  absent_ _present, 202 'Abdomen, sternites 3-6 fused along midline ' /  absent_ _present, 203 Pygidium_distinctly_swollen_ /  absent_ _present, 204 'Pygidium with grooved line(s) and/or ring ' /  absent_ _present, 205 'Pygidium, medial pit' /  _absent_ _present ; 
	MATRIX
	'Aphodius_erraticus'            1100000000000000000000100000000000000000000000000000100000000000000100010000000000000000000000000000000000000000000000000000000000000000000000000000000000000000000001001110000010002200000000000000000000000
	'Podotenus_fulviventris'        1100000000000000000000100000000000000000000000000000100000000000000100010000000000000000000000000000000000000000000000000000000000000000000000000000000000000000000000001110000010002200000000000000000000000
	'Aulonocnemis_crassecostata'    1100000000000000000000100000000000000000000000000000100000000000000100010000000000000000000000000000000000000000000000001000000000000000000000000000000000000110000000001110000010001200000010001000000000000
	'Manjarivolo_sp'                11000000000000000000001000000000000000000000000000001000000000000010001010100000000000000000000---------------------00000000000000000000000000000000010000000110000000001110000010001200000010001000000000000
	'Coptorhina_auspicata'          0010000000000000000001000010000000000000000110000000000000001000000100010000000000001000000000011100000000000000000100000000000000000000000000000010000000001010010000001110000010001201010000001000000000000
	'Delopleurus_sp'                0011000000000000000001000010000000000000000110000000000000001000000100010000000000001000000000011100000000000000000110000000000000000000000000000010000000001010010000001110000010001201010000001000000000000
	'Frankenbergerius_armatus'      0010000000000000000001000010000000000000000101000000000000001000000100010000000000001000000000011010000000000000000100000000000000000000000000000010000000001010010100001110000010001201000000001000000000010
	'Sarophorus_costatus'           0010000000000000000000100000000000000000000000000000000000000000000100010000000000001000000000011010000000000000000100000000000000000000000000000010000000001010000100001110000010001201000000001000000000000
	'Odontoloma_sp'                 00100000100000000000011000000000000100000000000000000000000010000010001011000000000000000000000---------------------00000000000000000000000000000000100000001010000100101110000010001200000000001000000010010
	'Nebulasilvius_insularis'       00100000100000000000010110000000000000000000000000000000000010000010100011000000000000010000000---------------------00000000000000000000000000000000110000001010000100101110000010000000000000001000000000001
	'Endroedyolus_paradoxus'        00100000100000000000010110000000000000000000000000000000000010000010100011000000000000010000000---------------------00000000000000000000000000000000110000001010000100101110000010001200000010001000000000001
	'Dicranocara_deschodti'         10100001000000000000010101000000000000000000000000000100000010000010001000000000000000100000000---------------------00100000101000000000010000010000100000001010000100001110000010001200000000001000000000000
	'Byrrhidium_namaquensis'        10100001000000000000010101000000000000000000000000000100000010000010001000000000000000100000000---------------------00100000101000000000010000010000100000001010000100001110000010001200000000001000000000000
	'Paraphytus_sp'                 00100000000000000000010100000000000000000000000000000000000000000001000100000000000000000100000---------------------00000000000000000000000010000000000000001010000100001110000010000200000000001000000001011
	'Epirinus_sp'                   0011010000000000000011100000000000010000000000110100000010000000001001001010000000000100000000000001010000000000000100000100000000000000000000000000100000000100010100001110000010001200000000001000000000000
	'Neosisyphus_sp'                1010000000000000000011100000010000010000000000110100000010000000010001000000000000000100000000000001010000000000000100000100000000000000000000000000100000000100010100001110000010001200000000001000000000000
	'Macroderes_mutilans'           10100010000000000000111000010000000100000000001100000000100000000001000110100000000000000000000---------------------00000100000000000000000000000000100000001000000000001110000010001200000000001000000000000
	'Xinidium_dentilabris'          1010001000000000000011100001000000010000000000110000000010000000000100010000000000000000000000000000000000000000000100000100000000000000000000000000100000001000000000001110000010001200000000001000000000000
	'Pedaria_sp'                    1010010000000000000011100000000000010100000000110000000010000000000100010000000000000000000000000000000000000000000100000100000000000000000000000000100000001010?00100101110000010001200000000001100000000010
	'Gyronotus_carinatus'           10100100000000000000111000000000000110000000001100000000100000000010001011000000000000000000000---------------------00000100000000000000000000000000100000000000000100001000000010001200000000001000000000000
	'Anachalcos_convexus'           1010010000000000000011100000000000011000000000110000000010000000001000101100000000000000000000000000000000000000100100000100000000000001000000000001100000001000000100001000000010001200000000001000000000000
	'Hammondantus_psammophilus'     1010010001000000000011100000000000010000000000110000000010000000001000100000000000000000000001000000000000000000000100000100000000000000000000000000100000000000000100001110100010001200000000001000000000000
	'Pycnopanelus_krikkeni'         1010010001000000000011100000000000010000000000110000000010000000001000100000000000000000000001000000000000000000000100000100000000000000000000000000100000001010000100001110000010001200000000001000000000000
	'Janssensantus_pauliani'        1010010000000000000011100000000000010000000000110000000010000000001000101011010000000000000000000000000000000000000100000100000000000000000000000000100000001010100100001110000010001200001000001000000000000
	'Aphengoecus_multiserratus'     10100100000000000000111000000000000100000000001100000000100000000010010011010100000000000000000---------------------00000100000000000000000000000000100000001010000100011110000010001200000000001000000000000
	'Bohepilissus_sp'               10100100000000000000111000000000000000000000001100000000000000000100010011000000100000000000000---------------------0000??00000000000000000000000000100000001010000100011110000010001200000000001000000000000
	'Circellium_bacchus'            10100100000000000000111000000000000100000100001100000000000000000010001011000000000000000000000---------------------00000100000000000000000000000000100000000000000100001000000010001200000000001000000000000
	'Dwesasilvasedis_medinae'       10100100000000000000111000000000000100000000001100000000100000000001000110100000000000000000000---------------------00000100000000000000000000000000100000001000000000000110000010001200000000001000000000000
	'Coptodactyla_nitida'           1010000000000000000011100000000000010100000000110000001010000000000100010000000000000000000000000000000000000000000100000100000000000000000001000000100000001010100000101000000010001200000000101000000000010
	'Amphistomus_calcaratus'        1010000000000000000011100000000000010000100000110000000000000000000100011100000000000000000000000000000000000000000100000100000000000000000001000001100000001010000100001110000010001200000000001000000000000
	'Aulacopris_maximus'            1010010000100000000011100000000000010000000000110000000000000000001000101100000000000000000000000000000000000000000100001000000000000000000000000001100000001000000100001110000010001200000000001000000000000
	'Canthonosoma__macleayi'        10100100001000000000111000000000000100000000001100000000000000000010001011000000000000000000000---------------------00001000000000000000000000000001100000001000000100001000000010001200000000001000000000000
	'Boletoscapter_cornutus'        1010000000000000000011100000000000010000000000110000000000000000000100011100000000000000000000000000000000000000000100000100000000000000000000000000100000001010000000011110000010001200000000001000000000000
	'Gen._nov._sp._nov.'            10100100000000000000111000000000000100001000001100000010100000000001000111000000000000000000000---------------------00000000000000000000000000000000100000001010000100101110001110001200000000001000000000000
	'Cephalodesmius_armiger'        10100000000000000000111000000000000100000000001100000000000000000010001011000000000000000000000---------------------00001000000000000000000000000000100000001000000100001110000010001200000000001000000000000
	'Coproecus_hemisphaericus'      10100100000000000000111000000100000100000000001100000000100000000010001011000000000000000000000---------------------00000100000000000000000000000000100000001010000100001110000010001200000000001000000000010
	'Demarziella_interrupta'        1010010000000000000011100000000000010000000000110000001000000000000100010000000000000000000000000000000000000000000100000000000000000000000000000000100000001010100100111110000010001200000000001000000000010
	'Diorygopyx_tibialis'           10100100000000000000111000000000000100000000001100000000100000000001001010110010000000000000000---------------------00001000000000000000000000000000100000001010000100111110001010001200000000001000000000010
	'Mentophilus_hollandiae'        10100100000000000000111000000100000100000000001100000000100000000010001011000000000000000000000---------------------00001000000000000000000000000000100000001000000100001110000010001200000000001000000000010
	'Onthobium__gutierrez'          10100100000000000000111000000100000100000000001100000000100000000001000111000000000000000000000---------------------00000100000000000000000000000000100000001010100100011110011110001200000000001000000000010
	'Pseudonthobium_sinuatotibiale' 10100100000000000000111000000100000100000000001100000000100000000001000111000000000000000000000---------------------00000100000000000000000000000000100000001010100100011110011110001200000000001000000000010
	'Tesserodon_erratum'            1010010000000000000011100000000000010000000000110000000010000000000100011100000000000000000000000000000000000000000100000100000000000000000000000000100000001010000100101110000010001200000000001000000000010
	'Saphobius_sp'                  10100000000000000000111000000000000100000000001100000010100000000001000111000000000000000000000---------------------00000100000000000000000000000000100000001010000100111110001110001200000000001000000000000
	'Bdelyrus_seminudus'            1010000000000000000011100000000000010000000000110000001010000000010000101101100010000000000000000000000000000000000100000100000000000000000000000000100000001010000100011110001110011200000000001000000000000
	'Tesserodoniella__elguetai'     10100100000000000000111000000000000100000000001100000000100000000010001000000000000000000000000---------------------00000100000000000000000000000000100000001010100100001110001010001200000000001000000000000
	'Canthochilum_tureyra'          10100100000000000100?11000000010000?0000000000???0000000?0000000010001001100000000000000000000000000000000000000000100000000000000000000000000000000100000001010000100001110001010001200000000001000000000000
	'Canthonella_silphoides'        10100000000000000000??1000000000000?0000000000???0000000?0000000100010001100000010000000000000000000000000000000000100000000000000000000000000000000100000001010100100001110001010001200000000001000000000000
	'Cryptocanthon_paradoxus'       10100000000000000000111000000000000100000000001100010000100000000100001011000000000000000000000---------------------00000100000000000000000000000000100000101010000100011110001010001200000000001000000000000
	'Paracanthon_sp_sp_n_'          1010010000000000000011100000000000010000000000110001000010000000010001000000000000000000000000000000000000000000000100000000000000000000000000000000100000001010100100001110001010001200000000001000000000000
	'Streblopus_opatroides'         1010010000000000000011100000000000010000000000110000000000000000001000101100000000000000000000000000000000000000000100000100000000000000100000000000100000000000000000000000000010001200000000001000000000000
	'Zonocopris_gibbicollis'        1010000000000000000011100000000000010000000000110000001000000000010001001100000000000000001000000000000000000000000100000000000000000000000000000000100001001010000100001111000010011200000010001000000000010
	'Genieridium_margareteae'       1010000000000100000111100000100000000000000000000000000010001000010000100000000000000000111000000000000000000000010100001000000000000000000000000000100000011010100100101110000010001210000000001100000000010
	'Onoreidium_howdeni'            1010000000000100000101100000100000000000000000000000000000001000010001000000000000000000001000000000000000000000000100001000000000000000000000000000100000011010100100101110000010001210000000001110000000010
	'Trichillum_pauliani'           1010000000000100000101100000100000000000000000000000000010001000010001000000000000000000011000000000000000000000010100000000000000000000000000000000100000011010100100101110000010001210000000001110000000010
	'Scatimus_strandi'              1010000000000000000011100000000000010000000000110000000000000000010000100000000000000000101000000000000000000000000100000100000000000000000000000000100000011010000100101110000010001210000000001000000000010
	'Aphengium_cupreum'             1010000000000000000011100000000000010000000000101000000010000000010001001100000000000000011000000000000000000000000100001000000000000100000000000000101000001010000100001110000010001210001000001100000000010
	'Ateuchus_squalidus'            1010000000000010000011100000000000010000000000101000000010000000010000100000000000000000011000000000000000000000000100001000000000000100000000000000101000001010000100001110000010001200001000001000000000010
	'Ateuchus_histeroides'          1010000000000010000011100000000000010000000000101000000010000000010001000000000000000000011000000000000000000000000100001000000000000100000000000000101000001010000100001110000010001200001000001000000000010
	'Agamopus_lampros'              1010000000000000000011100000000000000000000000101010000000000000010001000000000000000000001000000000000000000000000100001000000000000000000000000000100000001010100100101110000010001200001100001000000000010
	'Agamopus_viridis'              1010000000000000000011100000000000110000000000101010000010000000010001000000000000000000001000000000000000000000000100001000000000000000000000000000100000001010100100101110000010001200001100001000000000010
	'Canthidium_bokermanni'         1010000000000000000011100000000000010000000000101000000010000000001000100000000000000000000110000001000000000000000100000100000000000000000000000000100000000000000000001110000010001200000000001000100000000
	'Chalcocopris_hesperus'         1010000000001000000011100000000000010000000000101000000011000100010000100000000000000000000000000000000010000000000100001011000100000000101000000000100100000000000000001110000010001200000000001000000000000
	'Dichotomius_sp'                1010000000001000000011100000000000010000000000101000000011000100010000100000000000000000000000000001000010000000000100001011000100000000101000000000100100000000000000001110000010001200000000001000000000000
	'Dichotomius_sericeus'          1010000000001000000011100000000000010000000000101000000011000100010000100000000000000000000000000001000010000000000100001011000100000000101000000000100100000000000000001110000010001200000000001000000000000
	'Homocopris_torulosus'          1010000000000000000011100000000000010000000000101000000010000000001000100000000000000000000110000000000000000000000100000100000100000000000000000000100000001000000000001110000010001200000000001000100000000
	'Ontherus_appendiculatus'       1010010000000000000011100000000000010000000000110000000010000000001000100000000000000000000110000000000000000001000100001000000100001000000000000000100000011000100000001110000010001200000000001000100010000
	'Uroxys_latesulcatus'           1010000000000000000011100000000000110000000000110000000010000000001000100000000000000000000110000000000000000000000100000100000000000000000000000000100000001000000000101110000010001200001000001000000010010
	'Uroxys_epipleuralis'           10100000000000000000111000000000000100000000001100000000100000000100010011000000000000000110000---------------------00000100000000000000000000000000100000001010000100101110000010001200001000001000000010010
	'Uroxys_pauliani'               1010000000000000000011100000000000010000000000110000000010000000010001000000000000000000010000000000000000000000000100000100000000000000000000000000100000001010000100101110000010001200001000001000000010010
	'Bdelyropsis_bowditchi'         1010000000000000000011100000000000010000000000110000001010000000010001001100000000000000001000000000000000000000000100000100000000000000000000000000100000001000000100101110000010001200001000001000000010010
	'Canthon_virens'                1010000000000000000011100000000000010000000000110000000010000000000100011010000000100000000000000001101100000000000100000100000000000010000000000000100000001001000100001110000010101200000000001000000000000
	'Malagoniella_yucateca'         1010000000000000000011100000000000010000000000110000000010000000000100011010000000100000000000000001101100000000000100000100000010000010000000000000100000001000000100001110000010101200000000101000000000000
	'Megathoposoma_candezei'        1010000000000000000011100000000000010000000000110000000010000000000100011010000000110000000000000001101000000000000100000100000010000010000000000000100000000000000100001110000010101200000000101000000000000
	'Scybalophagus_rugosus'         1010000000000000000011100000000000010000000000110000000010000000000100011010000000100000000000000001101100000000000100000100000010000010000000000001100000000000000100001110000010001200000001001000000000000
	'Deltochilum_sp__'              1010000000000000000011100000000000010000000000110000000010000000000100011010000000110000000000000001101100000000000100000100000010000010000000000001100000000000000100001110000010101200000000001000000000000
	'Scybalocanthon_nigriceps'      1010010000000000000011100000000000010000000000110000000010000000001000101010000000000000000000000001101100000000000100000100000000000000000000000000100000000000000100001110000010101200000000001000000000000
	'Hansreia_sp'                   1010000000000000000011100000000000010000000000110000000010000000001000010000000000000000000000000001101100000000000100000100000010000010000000000001100000001000000100001110000010101200000000001000000000000
	'Silvicanthon_bridarollii'      1010000000000000000011100000000000010000000000110000000010000000001000100000000000000000000000000001101100000000000100000100000010000010000000000000100000001000000100001110000010101200000000001000000000000
	'Tetraechma_sanguineomaculata'  1010000000000000000011100000000000010000000000110000000010000000001000101010000000000000000000000001101100000000000100000000000010000010000000000000100000000000000100001110000010001200000000001000000000000
	'Anomiopus_edmondsi'            1010000000000000000011100000000000010000000000110000000010000000010000010000000001000000000000000001101100000000000100000100000000000000000000000000100000001001000100001110000010001200000000001000000000000
	'Scatonomus_fasciculatus'       1010000000000000000011100000000000010000000000110000000010000000001000010000000001000000000000000001101100000000000101000100000000000000000000000000100010001000000100001110000010001200000000001000000000000
	'Sinapisoma_sp'                 1010000000000000000011100000000000010000000000101000000000000000010001000000000000000000000000000000000000000000000100000000000000000000000000000000101000001010000000001110000010001200000000001000000000000
	'Heliocopris_sp'                10100000000000000000111000000000000100000000001??000000010000000000100011100000000000000000000000000000000000000100100001000000100000000100000000000100000000000000000001110000010001200000000001000000000000
	'Catharsius_sp'                 1010010000010000000011100000000000010000000000110000000110000000001000101010000000000000000000000000000000000001100100000100000000001000100000000000100000000000000000001110000010001200000000001000000000000
	'Metacatharsius_sp'             1010000000010000000011100000000000010000000000110000000010000000000100101010000000000000000000000000000000000001000100000100000000001000100000000000100000001000000000001110000010001200000000001000000000000
	'Copris_sp'                     1010000000000000000011100000000000010000000000101000000010000000000100100000000000000000000010000000000000000000100100001000000000000000000000100000100000001000100000001110000010001200000000001000000000000
	'Pseudopedaria_grossa'          1010000000000000000011100000000000010011000000101000000010000001000100100000000000000000000000000000000000000000100100000100000000000000000000000000100000001000100000001110000010001200000000001000000000000
	'Microcopris_sp'                1010000000000000000011100000000000010011000000101000000010000001000100100000000000000000000000000000000000000000100100001000000000000000000000100000100000001000000000001110000010001200000000001000000000000
	'Gromphas_aeruginosa'           1010000000000000000011100000000001010000000000101000000010000000001000100000000000000000000000000001000010000000000100000100000100000000100000000000100000000000001000001010000000001200000001001000100000000
	'Coprophanaeus_telamon'         1010000000000000000011100000000011010000000000101000000010000000001000100000000000000000000000000001000010000000000100000100000100000000100000000000100000000000001000001000000000001200000001011001000000000
	'Oruscatus_davus'               1010000000000000000011100000000001010000000000101000000010000000000100010000000000000000000000000001000000000000000100000100000100000000100000000000100000000000001000001000000000001200000001011001000000000
	'Phanaeus_splendidulus'         1010000000000000000011100000000011010000000000101000000010000000001000100000000000000000000000000001000000000000000100001000000100000000100000000000100100000000001000001000000000001200000001011001000000000
	'Ennearabdus_lobocephalus'      1010100000000000000011100000000001010000000000101000000010000000000100010000000000000000000000000000000000000000000100001000000100000000100000000000100100000000001000001000000010001200000001001000000000000
	'Eucranium_arachnoides'         10101000000000000000111000000000010100000000001010000000100000000010001000000000000000000000000---------------------00001000010000010000100100001000100100000000000000001000000000001200000000001000000000000
	'Glyphoderus_monticola'         10101000000000000000111000000000010100000000001010000000100000000010001011000000000000000000000---------------------00001000010000010000100100001000000100000000000000001000000000001200000000001000000000000
	'Eurysternus_hamaticollis'      1010000000000000000011100000000001010000000000101000000010000000010001000000000000000000000000000001000100000000000100000100000000100000100000000000100000000100000110000110000010001200000000101000000000000
	'Pachysoma_aesculapius'         10100000000000000000111000000000000100000100001100000000000000000010001011000000100000000000000---------------------00010000000001000000000100000100100100000000000000001000000010001200000000001000000100000
	'Scarabaeus_aegyptiorum'        1010010000000000000011100000000000010000010000110000000000000000001000101100000100000000000000000001000001000000000100000000000000000000000000000000100000000000000000001000000011001100000001001000000000000
	'Paragymnopleurus_sp'           10100000000000000000111000000001000100000000001100000000?0000000001000100000000000000000000000000001000001110000000100000000000000000000000000000001100000000100000100001110000010001200100001001000010000000
	'Gymnopleurus_leei'             10100000000000000000111000000001000100000000001100000000?0000000001000100000000000000000000000100001000101110000000100000000000000000000000000000001100000000100000100001110000010001200100001001000011000000
	'Epactoides_sp1'                1010000000000000000011100000000000010000001000110000000000000000001000101100000010000000000000000001000000000110000100000100000000000000000000000000100000001010000101011110000010001200000000001000000000100
	'Epactoides_sp2'                101000000000000000001110000000000001000000100011000000000000000000100010110000001000000000000000000100000000011000010000010000000000000000000000000010000000??00000101011110000010001200000000001000000000100
	'Ochicanthon_sp'                1010000000000000000011100000000000010000000000101000000000000000001000101100000010000000000000000001000000000110000100000100000000000000000000000000100000001010000100011110000010001200000000001000000000100
	'Apotolamprus__quadrimaculatus' 1010000000000000001011100000000000010000010000110000000010000000010000101100000000000000000000000000000000000000000100000100000000000000000000000000100000001010100100001110001110001200000000001000000000100
	'Arachnodes_sp_'                1010010000000000001011100000000000010000010000110000000000000000010000100000000000000000000000000000000000000000000100000100000000000000000000000000100000001010000100001110001110001200000000001000000000000
	'Tanzanolus_sp'                 1010000000000000000011100000000000000000000000000000000000000000001000101100000010000000000000000000000000000000001100000100000000000000000000000000100000001010100100001110000010001200000000001000000000100
	'Onthophagus_avocetta'          1010000000000001000011100000000000010000000000101000000010100010010001000000000000000000000000000001010000001000000100000100000000000000000000000000100000011000000000001110000010001200000000001000100000000
	'Helictopleurus_quadripunctatus'1010000000000001000011100000000000010000000000110000000010100010010001000000000000000000000000000001010000001000000100000100000000000000000000000000100000011000000000001110000010001200000000101000100000000
	'Bubas_bison'                   1010010000000000100011100000000001010000000000110000000010010000000100011010000000000000000000000001000000001000000100000100000000000000000000000000100000000000001000000000000010001200000000101000100000000
	'Onitis_sp'                     1010000000000000100011100000000001010000000000110000000010010000000100011010000000000000000000000001000000001000000100000100000000000000000000000000100000000000001000000000000010001200000000101000100000000

;

END;
BEGIN LABELS;
	TAXAGROUPLABEL Dichotomiini COLOR = (RGB 0.33333333 0.33333333 1.0) ;
	TAXAGROUPLABEL Deltochilini COLOR = (RGB 0.07450980 0.73333333 0.20392157) ;
	TAXAGROUPLABEL Coprini COLOR = (RGB 0.93333333 0.76470588 0.09411765) ;
	TAXAGROUPLABEL Phanaeini COLOR = (RGB 0.93333333 0.03137255 0.39215686) ;
	TAXAGROUPLABEL Eucranini COLOR = (RGB 0.90196078 0.88627451 0.83921569) ;
	TAXAGROUPLABEL Outgroup COLOR = (RGB 0.86666667 0.86666667 1.0) ;
	TAXAGROUPLABEL Scar&Gymn COLOR = (RGB 1.0 0.83529412 0.90196078) ;

	CHARGROUPLABEL Hypotheses COLOR = (RGB 1.0 0.76862745 0.95294118) ;
	CHARGROUPLABEL Not_for_analyses COLOR = (RGB 0.30196078 1.0 0.30196078) ;
	CHARGROUPLABEL Phallobase COLOR = (RGB 1.0 0.66666667 1.0) ;
	CHARGROUPLABEL Parameres COLOR = (RGB 0.70588235 0.63529412 1.0) ;
	CHARGROUPLABEL A COLOR = (RGB 1.0 0.2 0.2) ;
	CHARGROUPLABEL SA COLOR = (RGB 0.46666667 1.0 0.33333333) ;
	CHARGROUPLABEL 'FLP*' COLOR = (RGB 0.76862745 0.76862745 1.0) ;
	CHARGROUPLABEL srp COLOR = (RGB 1.0 0.30196078 0.58039216) ;
	CHARGROUPLABEL FLP COLOR = (RGB 0.94117647 0.90196078 1.0) ;
	CHARGROUPLABEL Spicul_gastrale COLOR = (RGB 1.0 1.0 0.56862745) ;
	CHARGROUPLABEL A&SA COLOR = (RGB 1.0 0.63921569 0.10196078) ;
	CHARGROUPLABEL Sclerites_varia COLOR = (RGB 0.6 1.0 0.6) ;
	CHARGROUPLABEL Elytra COLOR = (RGB 1.0 0.57254902 0.46666667) ;
	CHARGROUPLABEL Wing COLOR = (RGB 0.90588235 0.76862745 1.0) ;
	CHARGROUPLABEL Maxilla COLOR = (RGB 1.0 0.63529412 1.0) ;
	CHARGROUPLABEL Glossa COLOR = (RGB 1.0 1.0 0.36862745) ;
	CHARGROUPLABEL Epipharynx COLOR = (RGB 0.10196078 0.27843137 1.0) ;
	CHARGROUPLABEL Mandible COLOR = (RGB 0.46666667 0.46666667 0.46666667) ;
	CHARGROUPLABEL Gula COLOR = (RGB 1.0 1.0 0.16862745) ;
	CHARGROUPLABEL Eye COLOR = (RGB 0.13333333 1.0 0.13333333) ;
	CHARGROUPLABEL Clypeus COLOR = (RGB 0.13333333 1.0 1.0) ;
	CHARGROUPLABEL Head_skeleton COLOR = (RGB 0.66666667 1.0 0.16862745) ;
	CHARGROUPLABEL Antennae COLOR = (RGB 1.0 0.74117647 0.56862745) ;
	CHARGROUPLABEL Propleura COLOR = (RGB 0.46666667 0.67843137 1.0) ;
	CHARGROUPLABEL Prosternum COLOR = (RGB 1.0 0.03529412 0.41960784) ;
	CHARGROUPLABEL Foreleg COLOR = (RGB 0.73333333 0.33333333 1.0) ;
	CHARGROUPLABEL Leg COLOR = (RGB 1.0 1.0 0.56862745) ;
	CHARGROUPLABEL Mesosternum COLOR = (RGB 1.0 0.6 0.6) ;
	CHARGROUPLABEL Metepisternum COLOR = (RGB 0.30196078 1.0 0.43921569) ;
	CHARGROUPLABEL Internal_furci COLOR = (RGB 0.8 0.50196078 1.0) ;
	CHARGROUPLABEL Abdomen COLOR = (RGB 1.0 0.63921569 0.10196078) ;
	CHARGROUPLABEL 'Changes_Chars' COLOR = (RGB 1.0 1.0 0.03529412) ;


END;

BEGIN SETS;
	TAXPARTITION * UNTITLED  =  Outgroup :  1 -  4, Dichotomiini :  5 -  8 14 17 -  19 37 44 52 -  57 61 -  70 80 -  81 83, Deltochilini :  9 -  10 12 -  13 15 20 -  28 30 -  36 38 -  43 45 -  51 59 -  60 71 -  79 82 101 -  103 105 -  106, Coprini :  29 84 -  88, Phanaeini :  89 -  92, Eucranini :  93 -  95, Scar&Gymn :  97 -  100;

	CHARPARTITION * UNTITLED  =  Phallobase :  1 -  5, Parameres :  6 -  19, Sclerites_varia :  20 61 -  64, 'Changes_Chars' :  21 -  22 36 47 -  49 57, A :  23 -  35, SA :  37 -  39, A&SA :  40 -  43, 'FLP*' :  44 -  46, srp :  50 -  52, Spicul_gastrale :  53 -  56, FLP :  58 -  60, Elytra :  73 - 76\3 80 -  95, Wing :  96 -  116, Maxilla :  117 -  126, Glossa :  127 -  137, Epipharynx :  138 -  143, Mandible :  144 -  146, Gula :  147 -  149, Eye :  150, Clypeus :  151 -  154, Head_skeleton :  155, Antennae :  156, Propleura :  157 -  161, Prosternum :  162 -  166, Foreleg :  167 -  174, Leg :  175 177 -  182, Metepisternum :  183 -  186, Internal_furci :  187 -  188, Mesosternum :  189 -  190, Abdomen :  193 -  205;

END;

BEGIN ASSUMPTIONS;
	TYPESET * UNTITLED   =  unord:  1 -  205;

	EXSET * UNTITLED  = ;

END;

BEGIN MESQUITECHARMODELS;
	ProbModelSet * UNTITLED   =  'Mk1 (est.)':  1 -  205;
END;

BEGIN NOTES;

	TEXT   TAXON = 83 CHARACTER = 6 TEXT = in_some_heliocopris_modified;

	TEXT   TAXON = 87 CHARACTER = 38 TEXT = maybe_1;
	TEXT   TAXON = 88 CHARACTER = 38 TEXT = maybe_1;

	TEXT   TAXON = 103 CHARACTER = 47 TEXT = unclear_whether_present_or_not;

	TEXT   TAXON = 83 CHARACTER = 48 TEXT = 'maybe ? cuz it''s ambiguos';

	TEXT   TAXON = 71 CHARACTER = 54 TEXT = missed;

	TEXT   TAXON = 96 CHARACTER = 55 TEXT = maybe_0_here;

END;

Begin MESQUITE;
		MESQUITESCRIPTVERSION 2;
		TITLE AUTO;
		tell ProjectCoordinator;
		timeSaved 1394216075036;
		getEmployee #mesquite.minimal.ManageTaxa.ManageTaxa;
		tell It;
			setID 0 8434874337772461062;
			tell It;
				setDefaultOrder  103 102 100 101 0 1 2 6 45 44 104 35 33 29 38 94 4 7 5 41 30 42 46 43 31 32 34 36 82 48 49 52 50 51 53 54 8 55 56 57 58 60 59 13 76 63 65 66 70 75 77 19 21 25 23 10 11 105 61 62 15 16 17 18 20 22 26 27 28 12 64 68 69 72 14 71 67 73 90 9 24 74 3 79 80 83 81 84 87 86 88 89 91 92 93 95 96 97 98 99 37 40 78 110 39 47 106 107 108 85;
				attachments ;
			endTell;
		endTell;
		getEmployee #mesquite.charMatrices.ManageCharacters.ManageCharacters;
		tell It;
			setID 0 5738928270169612543;
			tell It;
				setDefaultOrder  0 1 5 7 70 3 32 33 34 44 298 118 59 54 58 245 246 197 203 53 41 43 28 16 18 19 14 31 52 48 50 71 69 68 247 12 30 301 64 65 47 72 73 303 22 23 25 26 57 27 55 49 8 36 45 63 300 60 263 264 10 61 244 66 198 199 201 200 205 206 223 224 75 210 211 77 214 215 216 81 78 82 83 84 85 86 87 88 89 90 91 92 98 93 94 96 97 99 100 102 104 105 107 108 109 110 111 112 113 114 115 116 117 119 121 120 122 272 123 276 280 282 142 141 127 147 124 135 273 275 281 150 153 157 158 279 137 293 139 148 277 278 154 128 149 274 131 286 130 283 284 285 161 159 287 160 171 162 164 170 165 169 270 166 167 168 173 172 175 176 177 179 182 180 195 196 183 185 184 267 268 186 187 190 226 191 188 189 192 193 227 228 237 229 230 231 232 233 234 235 242 243 236 240 239;
				attachments ;
			endTell;
			mqVersion 275;
			checksumv 0 3 1996213600 null  getNumChars 205 numChars 205 getNumTaxa 110 numTaxa 110   short true   bits 7   states 7   sumSquaresStatesOnly 32449.0 sumSquares 32449.0 longCompressibleToShort false usingShortMatrix true   NumFiles 1 NumMatrices 1;
			mqVersion;
		endTell;
		getWindow;
		tell It;
			suppress;
			setResourcesState false false 119;
			setPopoutState 400;
			setExplanationSize 0;
			setAnnotationSize 0;
			setFontIncAnnot 0;
			setFontIncExp 0;
			setSize 1920 1060;
			setLocation -8 0;
			setFont SanSerif;
			setFontSize 10;
			getToolPalette;
			tell It;
			endTell;
			desuppress;
		endTell;
		getEmployee  #mesquite.minimal.ManageTaxa.ManageTaxa;
		tell It;
			showTaxa #8434874337772461062 #mesquite.lists.TaxonList.TaxonList;
			tell It;
				setTaxa #8434874337772461062;
				getWindow;
				tell It;
					newAssistant  #mesquite.lists.DefaultTaxaOrder.DefaultTaxaOrder;
					newAssistant  #mesquite.lists.TaxonListCurrPartition.TaxonListCurrPartition;
					setExplanationSize 30;
					setAnnotationSize 20;
					setFontIncAnnot 0;
					setFontIncExp 0;
					setSize 1801 993;
					setLocation -8 0;
					setFont SanSerif;
					setFontSize 10;
					getToolPalette;
					tell It;
						setTool mesquite.lists.TaxonList.TaxonListWindow.arrow;
					endTell;
				endTell;
				showWindow;
				getEmployee #mesquite.lists.ColorTaxon.ColorTaxon;
				tell It;
					setColor Red;
					removeColor off;
				endTell;
				getEmployee #mesquite.lists.TaxonListAnnotPanel.TaxonListAnnotPanel;
				tell It;
					togglePanel on;
				endTell;
			endTell;
		endTell;
		getEmployee  #mesquite.charMatrices.BasicDataWindowCoord.BasicDataWindowCoord;
		tell It;
			showDataWindow #5738928270169612543 #mesquite.charMatrices.BasicDataWindowMaker.BasicDataWindowMaker;
			tell It;
				getWindow;
				tell It;
					getTable;
					tell It;
						rowNamesWidth 249;
					endTell;
					setExplanationSize 30;
					setAnnotationSize 40;
					setFontIncAnnot 0;
					setFontIncExp 0;
					setSize 1801 973;
					setLocation -8 0;
					setFont SansSerif;
					setFontSize 12;
					getToolPalette;
					tell It;
						setTool mesquite.charMatrices.BasicDataWindowMaker.BasicDataWindow.arrow;
					endTell;
					setActive;
					setTool mesquite.charMatrices.BasicDataWindowMaker.BasicDataWindow.arrow;
					colorCells  #mesquite.charMatrices.ColorByState.ColorByState;
				tell It;
					setStateLimit 9;
					toggleUniformMaximum on;
				endTell;
					colorRowNames  #mesquite.charMatrices.TaxonGroupColor.TaxonGroupColor;
					colorColumnNames  #mesquite.charMatrices.CharGroupColor.CharGroupColor;
					colorText  #mesquite.charMatrices.NoColor.NoColor;
					setBackground White;
					toggleShowNames off;
					toggleShowTaxonNames on;
					toggleTight off;
					toggleThinRows off;
					toggleShowChanges on;
					toggleSeparateLines off;
					toggleShowStates on;
					toggleAutoWCharNames on;
					toggleAutoTaxonNames off;
					toggleShowDefaultCharNames off;
					toggleConstrainCW on;
					toggleBirdsEye off;
					toggleShowPaleGrid off;
					toggleShowPaleCellColors off;
					togglePaleInapplicable on;
					toggleShowBoldCellText off;
					toggleAllowAutosize on;
					toggleColorsPanel on;
					toggleDiagonal on;
					setDiagonalHeight 30;
					toggleLinkedScrolling on;
					toggleScrollLinkedTables off;
					getInfoPanel;
					tell It;
						btspOpen true;
						apOpen true;
						fpOpen true;
					endTell;
					toggleInfoPanel on;
				endTell;
				showWindow;
				getWindow;
				tell It;
					forceAutosize;
				endTell;
				getEmployee #mesquite.charMatrices.ColorCells.ColorCells;
				tell It;
					setColor Red;
					removeColor off;
				endTell;
				getEmployee #mesquite.categ.StateNamesEditor.StateNamesEditor;
				tell It;
					makeWindow;
					tell It;
						setExplanationSize 30;
						setAnnotationSize 20;
						setFontIncAnnot 0;
						setFontIncExp 0;
						setSize 1801 993;
						setLocation -8 0;
						setFont SanSerif;
						setFontSize 10;
						getToolPalette;
						tell It;
							setTool mesquite.categ.StateNamesEditor.StateNamesWindow.arrow;
						endTell;
						rowsAreCharacters on;
						toggleConstrainChar on;
						toggleConstrainCharNum 3;
						togglePanel off;
						toggleSummaryPanel off;
					endTell;
					showWindow;
				endTell;
				getEmployee #mesquite.categ.StateNamesStrip.StateNamesStrip;
				tell It;
					showStrip off;
				endTell;
				getEmployee #mesquite.charMatrices.AnnotPanel.AnnotPanel;
				tell It;
					togglePanel off;
				endTell;
				getEmployee #mesquite.charMatrices.CharReferenceStrip.CharReferenceStrip;
				tell It;
					showStrip off;
				endTell;
				getEmployee #mesquite.charMatrices.QuickKeySelector.QuickKeySelector;
				tell It;
					autotabOff;
				endTell;
				getEmployee #mesquite.charMatrices.SelSummaryStrip.SelSummaryStrip;
				tell It;
					showStrip off;
				endTell;
				getEmployee #mesquite.categ.SmallStateNamesEditor.SmallStateNamesEditor;
				tell It;
					panelOpen true;
				endTell;
			endTell;
		endTell;
		getEmployee  #mesquite.charMatrices.ManageCharacters.ManageCharacters;
		tell It;
			showCharacters #5738928270169612543 #mesquite.lists.CharacterList.CharacterList;
			tell It;
				setData 0;
				getWindow;
				tell It;
					newAssistant  #mesquite.lists.DefaultCharOrder.DefaultCharOrder;
					newAssistant  #mesquite.lists.CharListInclusion.CharListInclusion;
					newAssistant  #mesquite.lists.CharListPartition.CharListPartition;
					newAssistant  #mesquite.stochchar.CharListProbModels.CharListProbModels;
					getTable;
					tell It;
						rowNamesWidth 452;
						columnWidth 2 108;
					endTell;
					setExplanationSize 30;
					setAnnotationSize 20;
					setFontIncAnnot 0;
					setFontIncExp 0;
					setSize 1801 993;
					setLocation -8 0;
					setFont SanSerif;
					setFontSize 10;
					getToolPalette;
					tell It;
						setTool mesquite.lists.CharacterList.CharacterListWindow.arrow;
					endTell;
				endTell;
				showWindow;
				getEmployee #mesquite.lists.CharListAnnotPanel.CharListAnnotPanel;
				tell It;
					togglePanel off;
				endTell;
			endTell;
		endTell;
		endTell;
end;
